# Supplementary material for: Status of off-bottom mariculture in wave-exposed environments. Part 1. Global inventory of extractive species commercial farms in temperate waters
Source: Frontiers journal article supplement (doi:10.3389/faquc.2024.1411749), 2024-09-03
Supplement: Data_Sheet_1.xlsx [file Data_Sheet_1.xlsx]

## Sheet: Table S1
Countries and country subdivisions included in each region of the study area
Region	Countries	Subdivisions included in study area
ANE	Belgium, Denmark, Estonia, Faroe Islands, Finland, Germany, Iceland, Ireland, Latvia, Lithuania, Netherlands, Norway, Poland, Sweden and UK	All
ANE	France	North Sea, English Channel and Atlantic coast
ANE	Morocco	Atlantic coast
ANE	Russia	Murmansk, Arkhangelsk, Kaliningrad and Leningrad oblasts and Karelia Republic
ANE	Spain	Atlantic coast
ANW	Canada	New Brunswick, Newfoundland & Labrador, Nova Scotia, Prince Edward Island, and southern Québec
ANW	France	Saint-Pierre-et-Miquelon
ANW	USA	New England, New York, New Jersey, Delaware, Maryland and Virginia
MBS	Albania, Algeria, Bosnia-Hezegovina, Bulgaria, Croatia, Georgia, Greece, Italy, Malta, Monaco, Montenegro, Slovenia, Tunisia and Ukraine	All
MBS	France	Mediterranean coast
MBS	Morocco	Mediterranean coast
MBS	Russia	Krasnodar krai
MBS	Spain	Mediterranean coast
MBS	Turkey	Aegean, Marmara and Black seas
PNE	Canada	British Columbia
PNE	Mexico	State of Baja California
PNE	USA	Pacific states
PNW	China	Liaoning, Hebei, Shandong, Jiangsu provinces
PNW	Japan	Honshu Island north of 34.5o N and Hokkaido
PNW	North Korea and South Korea	All
PNW	Russia	Primorsky, Khabarovsk and Kamtchatka krais, Sakhalin and Magadan oblasts
TAA	Australia	South Australia, Victoria and Tasmania states and southern coast of Western Australia
TAA	New Zealand	All
TSAF	Namibia	All
TSAF	South Africa	West and South coasts
TSAM	Argentina, Chile, Falkland Islands	All
TSAM	Peru	South of 7o S

## Sheet: Table S2
Sources of the information on the general oceanic characteristics of the 8 regions of the study area
Subject	Region	Producer	Sources (all Web sites accessed between March 12 and March 25, 2024)
Coastal upwelling systems	Global	Kampf and Chapman (2016)	see Supplementary References
Extratropical cyclones	Global	Lodise et al. (2022)	see Supplementary References
Sea ice	ANW	Environnement and Natural Resources, Canada	https://www.canada.ca/en/environment-climate-change/services/ice-forecasts-observations/latest-conditions/climatology/ice-climate-normals.html
Sea ice	Global	Copernicus	https://climate.copernicus.eu/sea-ice
Sea ice	PNW	Zhang et al. (2023)	see Supplementary References
Temperature and salinity	Global	NOAA World Ocean Atlas Cimatologies (2023)	https://www.ncei.noaa.gov/access/world-ocean-atlas-2023f/
Tide	Global	ArcGIS Online	https://www.arcgis.com/home/item.html?id=3d626ffd8ca1483ca37d32fd430b277d
Tide and currents	Global	IRENA Global Atlas for Renewable Energy	https://globalatlas.irena.org/workspace?type=workspace&layergroup=Layer%2520group%25201
Tropical cyclones	Global	Gris Arendal	https://www.grida.no/resources/7802
Tsunamis	Global	Reid and Mooney (2022)	see Supplementary References
Waves	Global	Global Atlas of Ocean Waves	http://www.sail.msk.ru/atlas/
Waves	Global	Matinez and Iglesias (2020)	see Supplementary References

## Sheet: Table S3
Sources of the high resolution aquaculture lease maps used in this study
Country(ies)	Country subdivision(s)	Map type	Producer	Source (all Web Sites were accessed between March 3 and March 29, 2024)
Multinational	Adriatic Sea	KML File	Data adriplan.eu	http://data.tools4msp.eu/layers/geonode%3Abs_marinefarm_pl_2
Multinational	Europe	Web-GIS	EMODnet MapServer	https://emodnet.ec.europa.eu/geoviewer/
Multinational	Western Baltic Sea	Web-GIS	HELCOM Map and Data Server (MADS)	https://metadata.helcom.fi/geonetwork/srv/fre/catalog.search#/metadata/63d666f3-3bae-4d8a-aa91-7234e5eef1c3
Multinational	Adriatic and Ionian seas	Web-Gis	Portodimare Project Eu	https://www.portodimare.eu/
Algeria	National	WebGIS	Portail catographique de l'aquaculture	https://aquamap-algerie.cdta.dz/#
Argentina	National	Static	ReFACUA	http://www.refacua.gob.ar/documentos/MAPA.jpg
Australia	South Australia	KML File	Australian Government Data	https://data.gov.au/dataset/ds-sa-b1dd2266-3e63-4238-a5e0-5c9c8b44f24d/distribution/dist-sa-f7ecc8b6-3852-48ed-baab-285ca3d485b2/details?q=
Australia	South Australia	Web-GIS	Aquaculture Public Register	https://www.aginsight.sa.gov.au/?Bookmark=Ox473rlD
Australia	Tasmania	Web-GIS	GISList Data Marine Leases	https://maps.thelist.tas.gov.au/listmap/app/list/map?layout-options=LAYER_LIST_OPEN&cpoint=147.50,-42.90,50000&srs=EPSG:4283&bmlayer=3&layers=159
Australia	Victoria	Web-GIS	Coatkit GIS	https://mapshare.vic.gov.au/coastkit/
Australia	Western Australia	Web-GIS	DataWA Web Mapping Service	https://catalogue.data.wa.gov.au/dataset/aquaculture-sites-dpird-001
Australia	South Australia	Web-GIS	Aquaculture Public Register	https://www.pir.sa.gov.au/aquaculture/aquaculture_public_register
Belgium	National	Web-GIS	KustPortaal	https://www.kustportaal.be/en/static-maps
Bulgaria	National	Web-GIS	Tools 4MDP Geoplatform	https://geoplatform.tools4msp.eu/maps/new?layer=geonode:aquacultures_bg_black_sea_verified&view=True#/
Canada	British Columbia	Static	Shellfish Aquaculture Map	https://www.dfo-mpo.gc.ca/aquaculture/bc-cb/maps-cartes-eng.html#sites
Canada	British Columbia	Web-GIS	Marine planning Atlas Pacific	https://gisp.dfo-mpo.gc.ca/apps/Pacific-Atlas/?locale=en
Canada	New Brunswick	Web-GIS	Marine Aquaculture Site Mapping Program (MASMP)	https://www2.gnb.ca/content/gnb/en/departments/10/aquaculture/content/masmp.html
Canada	Newfoundland	Web-GIS	Fisheries and Aquaculture Licensed Fish Processors and Aquaculture Sites	https://gis-and-mapping-gnl.hub.arcgis.com/apps/79612964557b4c3e895da0f5e1a0ee5e/explore
Canada	Nova Scotia	Web-GIS	Fisheries and Aquaculture Site Mapping Tool	https://novascotia.ca/fish/aquaculture/site-mapping-tool/
Canada	Prince Edward Island	Web-GIS	Aquaculture Leases	https://www.arcgis.com/home/webmap/viewer.html?webmap=16aa8830c7084a8a92ce066b525978b4
Canada	Québec	Web-GIS	Répertoire des sites maricoles	https://ogsl.ca/references/#_gl=1*ejh4x1*_ga*NTc1OTU3NjUyLjE2Nzg5Njg5MjU.*_ga_B7XMBXNSYV*MTY4MDc3NTA3OC40LjEuMTY4MDc3NTEyOS4wLjAuMA..
Chile	National	Web-GIS	Subpesca	http://mapas.subpesca.cl/ideviewer?locale=en-gb
Croatia	Regional	Static	Lukin (2014); Croatia Government (2010)	see Supplementary References
Denmark	National	Web-GIS	Det Marine Danmarkskort-DMD Mussel farms	https://kort.msdi.dk/spatialmap?profile=dmd
Estonia	National	Web-GIS	Aquaculture Holding (Inspire)	https://xgis.maaamet.ee/xgis2/page/app/eestigeo
France	English Channel/North sea	Static	SRDAM Manche Est/Mer du Nord	https://www.dirm.memn.developpement-durable.gouv.fr/schemas-regionaux-de-developpement-de-l-r122.html
France	Saint-Pierre and Miquelon	Static	Jaugeon (2018); CEREMA (2018)	see Supplementary References
France	Atlantic Loire	Web-GIS	Cadastre conchylicole	https://geo.data.gouv.fr/fr/datasets/daeb69638984961281b876151f59a463d88ce172
France	Brittany	Web-GIS	Géo-Bretagne Cadastre conchylicole	https://geobretagne.fr/mapfishapp/
France	National	Web-GIS	Portail de l'aquaculture	https://experience.arcgis.com/experience/45e186df09854fd3b0115fc2db6a27f7
Germany	German Bight	Static	Alfred Wegener Institute	https://www.awi.de/en/science/special-groups/aquaculture/marine-aquaculture/research/selected-finished-projects/gis.html
Germany	National	Web-GIS	GeoSeaPortal	https://www.bsh.de/EN/DATA/GeoSeaPortal/geoseaportal_node.html
Greece	National	Static	Marisca Project EU	http://www.marisca.eu/index.php/en/maps/maps-of-human-activities-in-the-aegean-sea/aquaculture
Iceland	National	Web-GIS	Landmaelingar Islands Atlas Shellfish farms	https://atlas.lmi.is/mapview/?application=haf
Ireland	National	Web-GIS	Aquaculture Sites	https://dafm-maps.marine.ie/aquaculture-viewer/
Italy	Emilia-Romagna	Web-GIS	Portodimare Geoportal, Mussel farms	https://www.portodimare.eu/layers_ext/geonode:a__2019_shellfish_farms_in__eztyo0#/
Italy	Emilia-Romagna	Web-GIS	Portale cartographico de Arpae	https://servizi-gis.arpae.it/Html5Viewer/index.html?locale=it-IT&viewer&viewer=Geoportal.Geoportal
Italy	Liguria	Web-GIS	Geoportale Regionale, Matriculture Farms	https://srvcarto.regione.liguria.it/geoviewer2/pages/apps/geoportale/index.html?id=911
Japan	National	Web-GIS	MDA Situational Indication Linkages	https://www.msil.go.jp/msil/htm/main.html?Lang=1
Malta	National	Static	Dept. Fish. Aquacult.	https://agricultureservices.gov.mt/en/fisheries/Pages/maltaAquacultureresCentre.aspx
Mexico	Baja California	Web-GIS	Conapesca Acuasesor	https://acuasesor.conapesca.gob.mx/mapa_estatal.php
Montenegro	Kotor Bay	Static	Mandic et al. (2016)	see Supplementary References
Morocco	National	Web-GIS	Geoportail de l'aquaculture	https://geoportail.anda.gov.ma/public/index.php?lang=en
Namibia	National	Web-GIS	Benguela Current Convention Geodata Portal	https://geodata.benguelacc.org/
New Zealand	National	Web-GIS	MPI Open Data Web	https://mpi.maps.arcgis.com/apps/webappviewer/index.html?id=fbdacfcb945c46118ff105ee45142fbe
Norway	National	Web-GIS	Akvakultur Lokaliteter	https://hub.arcgis.com/datasets/testkommune::akvakultur-lokaliteter/explore?location=63.951153%2C18.280710%2C6.13
Norway	National	Web-GIS	Fiskeridirektoratets kartdata Akvakultur	https://portal.fiskeridir.no/portal/apps/webappviewer/index.html?id=87d862c458774397a8466b148e3dd147
Peru	National	WebGIS	Catastro acuicola	http://catastroacuicola.produce.gob.pe/web/
Portugal	National	Web-GIS	GISPortugal	eaquicultura.pt/category/mapas-online/
Portugal	National	Web-GIS	DGRM Aquaculture Geoportal	https://webgis.dgrm.mm.gov.pt/portal/apps/webappviewer/index.html?id=8998c9b4e9dd436f94a4785c2da89478
Russia	Pacific, Northern Atlantic	Web-GIS	Aquavostok	https://app.aquavostok.ru/map
South Africa	National	Static	DAFF (2010); ARM (2011); DEFF (2020)	see Supplementary References
South Korea	National	Web-GIS	Korean Oceanographic Research Institute. Oceanmap	http://www.khoa.go.kr/oceanmap/main.do#
Spain	National	Web-GIS	AcuiVisor	https://servicio.pesca.mapama.es/acuivisor/
Spain	Andalucia	Web-GIS	SIG-Acuicola Andalucia	https://www.juntadeandalucia.es/organismos/agriculturapescaaguaydesarrollorural/areas/pesca-acuicultura/acuicultura/paginas/visor-sig-acuicola.html
Slovenia	National	Static	Ramsak et al. (2024)	see Supplementary References
Sweden	Vastra Gotaland County	Static	Informationskartan Västra Götaland	https://www.lansstyrelsen.se/publikation?entry=O_2020_02&context=13
Ukraine	Crimea	Web-GIS	Crimean Aquaculture Association	http://crime-aquaculture.rf
United Kingdom	Northern Ireland	KML File	DAERA Open Data	https://www.opendatani.gov.uk/fr/@department-of-agriculture-environment-and-rural-affairs/aquaculture-licences-open-data3
United Kingdom	National	Web-GIS	Admiralty Marine Data Solutions	https://datahub.admiralty.co.uk/portal/home/item.html?id=b4a9b41dd7ce421d85b9b37d14c828a8
United Kingdom	England/Wales	Web-GIS	ArcGIS Online	https://www.arcgis.com/apps/mapviewer/index.html?layers=23017db80d5344c2bc6f6909df0b4d10
United Kingdom	Scotland	Web-GIS	Crown Estate	https://crown-estate-scotland-spatial-hub-coregis.hub.arcgis.com/datasets/aquaculture-crown-estate-scotland/explore?location=58.076096%2C-4.400116%2C7.89
United Kingdom	Wales	Web-GIS	Wales Marine Planning Portal	http://lle.gov.wales/apps/marineportal/#lat=51.9330&lon=-5.4520&z=11&tgt=false&layers=390,180,428,429,430,431
United Kingdom	Guernsey	Static	Guernsey Gov. (2020)	see Supplementary References
United Kingdom	Jersey	Static	Jersey Gov. (2020)	see Supplementary References
USA	Alaska	Web-GIS	Alaska Department of Fish and Game Map Viewer	https://adfg.maps.arcgis.com/apps/webappviewer/index.html?id=f3ca95493c1042b39e42a3ecb5dcad6a
USA	Alaska	Web-GIS	State of Alaska Geoportal	https://gis.data.alaska.gov/datasets/SOA-DNR::aquatic-farm-permit-or-lease-polygon/explore?location=57.767339%2C-152.159687%2C10.70
USA	California	Web-GIS	Dept. Fish & Game Aquaculture Leases 2011	https://purl.stanford.edu/zk621ch0195
USA	Connecticut	Web-GIS	CTECO U. Connecticut Aquaculture Mapping Atlas	https://maps.cteco.uconn.edu/projects/aquaculture/
USA	Maine	Web-GIS	Maine Department of Marine Resources Aquaculture Map	https://www.maine.gov/dmr/aquaculture/leases/ aquaculturemap.html
USA	Maine	Web-GIS	Maine Department of Marine Resources	https://dmr-maine.opendata.arcgis.com/search?tags=aquaculture
USA	Massachusetts	Web-GIS	ShellfAST	https://marinegis-accolneaq.hub.arcgis.com/apps/ACCOLneaq::ma-shellfast-home/explore
USA	National	Web-GIS	Marine Cadastre	https://marinecadastre.gov/nationalviewer/
USA	New Hampshire	Web-GIS	Geodata Portal	https://www.nhgeodata.unh.edu/datasets/945118dfac364ea6ab220b4ca3499759/explore?location=43.037610%2C-70.755650%2C12.72
USA	New York	Web-GIS	Shellfish Aquaculture Lease Program (Suffolk County)	http://gis3.suffolkcountyny.gov/shellfish/
USA	New York and Connecticutt	Web-GIS	Shellfish and Seaweed Aquaculture Viewer	https://www.arcgis.com/apps/webappviewer/index.html?id=f8799cefbb4c4751a209710d14b9ad46
USA	Northeast	Web-GIS	Northeast Data Portal	https://www.northeastoceandata.org/
USA	Oregon	Web-GIS	Oregon Sea Grant	https://storymaps.arcgis.com/stories/bf4e927011d54b96957a4385e01d59a6
USA	Rhode Island	Web-GIS	RIDEM Marine Fisheries Maps	https://ridemgis.maps.arcgis.com/apps/webappviewer/index.html?id=8beb98d758f14265a84d69758d96742f
USA	Virginia	Web-GIS	Virginia Marine Resources Commission	https://webapps.mrc.virginia.gov/public/maps/chesapeakebay_map.php
USA	Washington State	Web-GIS	Commercial Shellfish Map Viewer	https://fortress.wa.gov/doh/oswpviewer/index.html

## Sheet: Table S4
Sources of high resolution wave information used in this study.
REGION	AREA COVERED	PRODUCER	SOURCES (all WEB sites accessed between March 9 and March 19, 2024)
Global	All	Copernicus Global Wave analysis and Forecast	https://data.marine.copernicus.eu/product/GLOBAL_ANALYSISFORECAST_WAV_001_027/description
ANE	Bay of Biscay	Thomas et al. (2023)	see Supplementary References
ANE	central and southern ANE	Copernicus Marine Service	https://marine.copernicus.eu/access-data/ocean-monitoring-indicators/iberia-biscay-ireland-significant-wave-height-extreme-0
ANE	Faroe Islands	Joensen et al. (2021)	see Supplementary References
ANE	Faroe Islands	Niclasen and Simonsen (2012)	see Supplementary References
ANE	Faroe Islands, Funningsfjord	Niclasen and Simonsen (2012)	see Supplementary References
ANE	France	WebService-Energy; Marine Energy Ressource	http://www.webservice-energy.org/resources-list/marine-resources
ANE	France	Webservice-Energy THREDDS	http://tds.webservice-energy.org/thredds/catalog/waves/catalog.html
ANE	France , Mediterranean Sea	Kerdagallan et al. (2023a)	see Supplementary References
ANE	France, Lannion Bay	Oliveros (1987)	see Supplementary References
ANE	France, North Sea, English Channel, Atlantic	Kerdagallan et al. (2023b)	see Supplementary References
ANE	France, northern Spain	Joensen et al. (2021)	see Supplementary References
ANE	France, Nouvelle-Aquitaine	SHOM (2021)	see Supplementary References
ANE	France, Pays de la Loire	Gonçalves et al. (2014)	see Supplementary References
ANE	France, southern Brittany	SHOM (2020)	see Supplementary References
ANE	France, southern Brittany	SHOM (2019)	see Supplementary References
ANE	France, western Brittany	Gillou and Chapalain (2015)	see Supplementary References
ANE	Ireland	Ireland's Marine Renewable Energy Atlas	http://atlas.marine.ie
ANE	Ireland	Selkie Ocean Energy GIS-TE Platform	https://rossoconnell.github.io/Selkie_Techno_Economic_GIS/
ANE	Ireland	Gallagher et al. (2016)	see Supplementary References
ANE	North and Baltic Seas	Bonaduce et al. (2019)	see Supplementary References
ANE	North Sea, southern	Lavidas and Polinder (2019)	see Supplementary References
ANE	Portugal	Costa et al. (2001); Campuzano et al. (2015)	see Supplementary References
ANE	Spain	IDAE (2011)	see Supplementary References
ANE	Spain, Basque Country	Galparsoro et al. (2008)	see Supplementary References
ANE	Sweden	Nilsson et al. (2019)	see Supplementary References
ANE	UK	Marine scotland Maps NMPPI	https://marinescotland.atkinsgeospatial.com/nmpi/default.aspx?layers=424
ANE	UK	UK Atlas of Marine Renewable Energy	https://www.renewables-atlas.info/
ANE	UK, northern Scotland	Venugopal and Nemalidinne (2015)	see Supplementary References
ANE	UK, southwestern England	van Nieuwkoop et al. (2013); Bento et al. (2013)	see Supplementary References
ANE, MBS	France	IFREMER MARC	https://marc.ifremer.fr/resultats/vagues
ANE, MBS	southern ANE and western Mediterranean	Guijarro et al. (2021)	see Supplementary References
ANE, MBS, PNW	Russia	Atlas waves Russian Seas	https://carto.geogr.msu.ru/wavenergy/
ANW	Canada, Bay of Fundy and southern Gulf of St. Lawrence	Cousineau et al. (2018)	see Supplementary References
ANW	Canada, eastern	Wave Climate	http://oceanweather.net/MSC50WaveAtlas/
ANW	Canada, eastern	Guo and Sheng (2015)	see Supplementary References
ANW	Canada, Gulf of St. Lawrence	Neumeier et al. (2013)	see Supplementary References
ANW	Canada, western Gulf of St. Lawrence	Ruest (2014)	see Supplementary References
ANW	Canada, western Gulf of St. Lawrence	Ruest et al. (2013)	see Supplementary References
ANW	Canafda, Magdalen Islands	Neumeier and Joly (2014)	see Supplementary References
ANW	USA, Maine	Panchang et al. (2008)	see Supplementary References
ANW and PNE	Canada	Cornett (2006)	see Supplementary References
ANW, PNE	USA	Marine energy Atlas	https://maps.nrel.gov/marine-energy-atlas/
MBS	Aegean Sea	Lavidas and Venugopal (2017); Lavidas (2019)	see Supplementary References
MBS	Black Sea	Copernicus Marine Service	https://marine.copernicus.eu/access-data/ocean-monitoring-indicators/black-sea-significant-wave-height-extreme-reanalysis
MBS	Black Sea	Akpinar and Komurcu (2013)	see Supplementary References
MBS	Bulgaria	Neykov et al. (2017)	see Supplementary References
MBS	Bulgaria	Valchev et al. (2015?)	see Supplementary References
MBS	France, Mediterranean Sea	SHOM 2021b	see Supplementary References
MBS	Greece and western Turkey	Emmanouil et al. (2016)	see Supplementary References
MBS	Greece and western Turkey	Soukissian et al. (2007)	see Supplementary References
MBS	Mediterranean Sea	Copernicus Marine Service	https://marine.copernicus.eu/access-data/ocean-monitoring-indicators/mediterranean-sea-significant-wave-height-extreme-0
MBS	Mediterranean Sea	Maestrale + CoastEnergy WebGIS	http://192.167.120.31/lizmap-web-client-3.1.4/lizmap/www/index.php/view/map/?repository=maestrale&project=maestrale
MBS	Mediterranean Sea, southwestern	Amarouche et al. (2020)	see Supplementary References
MBS	Northern Adriatic	Barbariol et al. (2013)	see Supplementary References
MBS	Turkey, Sinop	Akgul and Kabdasli (2014)	see Supplementary References
PNE	Canada, British Columbia	Robertson et al. (2015)	see Supplementary References
PNE	USA, Alaska	Alaska Ocean Observation System	https://portal.aoos.org/#map
PNE	USA, Alaska	Yang et al. (2019)	see Supplementary References
PNE	USA, Central and southern California	Melville et al. (2007)	see Supplementary References
PNW	Bohai and Yellow Seas	Dong et al. (2020)	see Supplementary References
PNW	Bohai and Yellow Seas	He and Xu (2016)	see Supplementary References
PNW	Bohai and Yellow Seas	Jiang et al. (2016)	see Supplementary References
PNW	China, Shandong	Liang et al. (2013)	see Supplementary References
PNW	Japan	Shimura et al. (2019)	see Supplementary References
PNW	Japan, Koreas, Primorsky Krai (Russia)	Marine Energy Web Portal	http://www.todaiww3.k.u-tokyo.ac.jp/nedo_p/en/webgis/
PNW	Japan, Koreas, Primorsky Krai (Russia)	Webb et al. (2020)	see Supplementary References
PNW	Koreas	Eum et al. (2020)	see Supplementary References
PNW	Sea of Japan	Woo and Park (2016)	see Supplementary References
PNW	South Korea, southern	Jeon et al. (2012)	see Supplementary References
TAA	Australia	National Map Australian Wave atlas	https://nationalmap.gov.au/renewables/#share=s-gGd5ztFcxe2ysy9f
TAA	New Zealand	NZ Wave Data Tool	https://uoa-eresearch.github.io/waves/hindcast.html#NZ-HIST-000-HSIGN-Hsig@1993-01-01%2000:00
TAA	New Zealand, Bay of Plenty	Knight et al. (2017)	see Supplementary References
TAA	New Zealand, Hauraki Gulf	Boxberg et al. (2020)	see Supplementary References
TAA	New Zealand, Pegasus Bay	Fenwick et al. (2003)	see Supplementary References
TAA	New Zealand, Tasman Bay	TDC (2019)	see Supplementary References
TSAM	Argentina, Chubut (Argentina)	Cardini (2008)	see Supplementary References
TSAM	Chile	Atlas de oleaje de Chile	https://oleaje.uv.cl/atlas.html

## Sheet: Table S5
Sources of information of longline design and farm layout of the 28 exposed farms described in this study
Site #	Location	Sources (see Supplementary References)
1	Brixham, Devon, UK	Mascorda-Cabre et al. (2024)
2	St. Austell, Cornwall, UK	CEFAS, 2010, 2016; Corrigan et al., 2024
3	Nieuwpoort, Belgium	IMDC, 2020
4	La Rochelle, France	Mille and Blachier, 2009; Mille and Le Moine, 2011; CREAA, 2012
5	Olhao, Algarve, Portugal	Araujo et al., 2018, 2020
6	Sagres, Algarve, Portugal	Santos, 2013
7	Andarroa, Euskadi, Spain	Azti Tecnalia, 2016; Zorita et al., 2023
8	La Rochelle, France	Mille and Blachier, 2009; Mille and Le Moine, 2011; CREAA, 2012
9	Loctudy, Brittany, France	CEVA, 2013
10	Funnigsfjordur, Faroe Islands	Bak et al., 2018
11	Rye Beach, NH, USA	Knysh et al. 2020
12	Magdalen Islands, QC, Canada	Gagnon and Bergeron, 2017
13	Paspébiac, QC, Canada	Rondeau and Bossé-Côte, 2021; Tamigneaux et al., 2012; Salaweg, 2023
14	Kavarna, Bulgaria	Fikovska, 2023; Black Sea Shells, 2023
15	Marbella, Andalucia, Spain	Jacumar, 2006
16	Sacca di Goro, Em.-Ro., Italy	Tamburini et al., 2020
17	Chioggia, Veneto, Italy	Brigolin et al., 2009; Vianello, 2018
18	Ras-el-Ma, Morocco	Morocco Government, 2023
19	Sète, Occitanie, France	Danioux et al. 2000; Cepralmar, 2017
20	Cala Iris, Morocco	Morocco Government, 2020
21	Santa Barbara, CA, USA	Cheney et al., 2010; CCC, 2018; USACE, 2018
22	Huntington Beach, CA, USA	USACE, 2012; CCC, 2013; Syvret et al., 2013
23	Sarufutsu, Hokkaido, Japan	Lucien-Brun and Lachaux, 1983
24	Rongcheng, Shandong, China	Zhang et al., 2012; Liu et al., 2019; Fang et al., 2020; Liu and Zhang, 2022; Liu et al., 2022b
25	Collingwood, New Zealand	Plew, 2005; Plew et al., 2005
26	Opotiki, New Zealand	Whakatoea, 2014; Pahiki, 2017; SCF, 2023; ODC, 2024
27	Camarones, Chubut, Argentina	Granja Marina San Julian, 2023
28	Tongoy, Coquimbo, Chile	Merino et al., 2001; Aravena, 2015; FONDEPES, 2020

## Sheet: Supplementary references
Supplementary references
Akgul, M. A., and Kabdasli, M. S. (2014). Assessment of wage energy potential on the shores of Sinop, Black Sea, Turkey. In Proc. Grand Renewable Energy. Tokyo, Japan, 27 July - 1 August, 2014.
Akpinar, A., and Ihsan Komurcu, M. (2012). Wave energy potential along the south-east coasts of the Black Sea. Energy 42, 289-302.
Amarouche, K., Akpınar, A., Bachari, N. E. I., Houma, F. (2020). Wave energy resource assessment along the Algerian coast based on 39-year wave hindcast. Renew. Energy 153, 840–860. [CrossRef]
Anchor Research & Monitoring Ltd. (ARM). (2011). Saldanha Bay aquacultrure development zone (ADZ) environmental control officer (ECO) monthly summary report. 6, September 2022. 11 p.
Araújo, J., Soares, F., and Pousão-Ferreira, P. (2018). Offshore Production of Mediterranean Mussels in Southern Portugal. World Aquac. 49, 55–57.
Araújo, J., Soares, F., Medeiros, A., Bandarra, N. M., Freire, M., Falcão. M., et al. (2020). Depth effect on growth and fatty acid profile of Mediterranean mussel (Mytilus galloprovincialis) produced on a longline off south Portugal. Aquac. Intern. 28: 927–946 doi:10.1007/s10499-019-00504-0
Aravena, S. H. G. (2015). Desempeno idrodimanico de un sistema de cultivo suspendido de ostion del norte mediante simulacion dinamica. Thesis. Pontifica Universidad Catolica de Valparaiso.
AZTI Tecnalia. (2016). Poligono para el cultivo extensivo y commercial de moluscos y otros invertebrados de interes en el tramo litoral del Dominio Público Marítimo Terrestre (DPMT) entre Ondarroa y Lekeitio (Bizkaia, País Vasco).
Bak U.G., Mols-Mortensen, A., and Gregersen, O. (2018). Production method and cost of commercial-scale offshore cultivation of kelp in the Faroe Islands using multiple partial harvesting. Algal Res. 33, 36-47. doi.org/10.1016/j.algal.2018.05.001
Barbariol, F., Benetazzo, A., Carniel, S., and Sclavo, M. (2013). Improving the assessment of wave energy resources by means of coupled wave ocean numerical modeling. Renew. Energy 60, 462–471. doi : 10.1016/j.renene.2013.05.043
Bento, A..R., Martinho, P., and Guedes Soares, C. (2013). Modelling wave energy resources for UK’s southwest coast. In Proceedings of the IEEE Oceans Conference, Santander, Spain, 6–9 June 2013. doi: 10.1109/Oceans-Spain.2011.6003533
Black Sea Shells, (2024). https://www.blackseashells.com/ [accessed March 28, 2024]
Bonaduce, A.; Stanevra, J.; Beherens, A.; Bidlot, J.; Wilcke, R.A.I. (2019). Wave climate change in the North Sea and Baltic Sea. J. Mar. Sci. Eng. 7, 166. doi: 10.3390/jmse7060166
Boxberg, F., Blossier, B., de Lange, W. P., Fox, B., and Hebbeln, D. (2019). Sediment deposition in the central Hauraki Gulf, New Zealand. Geo-Marine Letters, 1-15. doi:DOI:10.1007/s00367-01900583-1
Brigolin, D., DalMaschio, G., Ramapazzo, F., Giani, M., and Pastres, R. (2009). An individual based population dynamic model for estimating biomass yield and nutrient fluxes through an off-shore Mytilus galloprovincialis farm. Estuar. Coast. Shelf Sci. 82, 365–376. doi: 10.1016/j.ecss.2009.01.029
California Coastal commission (CC). (2013). Phil Cruver/KZO Seafarms/Catalina Sea Ranch/KZO Education. Summary of Staff Report W16 a.
California Coastal Commission (CCC). (2018). Santa Barbara Mariculture Company. Staff Recommendation. F11a.
Campuzano, F. J., Juliano, M., Fernandes, R., and Neves, R. (2015). Marine renewable energy resources atlas for continental Portugal. Technical Report · December 2015. doi: 10.13140/RG.2.2.21544.47360
Cardini, J. C. (2008). Estudios oceanográficos costeros en el Puerto de Camarones. V Congreso de la Asociacion de Ingenieros Portuarios, April 23-25, 2008
Centre d'Étude et de Valorisation des Algues (CEVA). (2013). Algolesko. Tome 1. Déclaration au titre de l'article R214-32 du code de l'Environnement. https://docplayer.fr/112426611-Algolesko-tome-1-declaration-au-titre-de-l-article-r-du-code-de-l-environnement.html [Accessed: March 28, 2024]
Centre d'étude pour la promotion des activités lagunaires et maritimes (CEPRALMAR). (2017). La conchyliculture en Occitanie 2016-2017.
Centre d'études et d'expertise sur le risques, la mobilité et l'aménagement (CEREMA). (2018). Saint-Pierre-et-Miquelon. Document stratégique de bassin maritime. Situation de l'existant. Direction des Territoires, de l'Alimentation et de la Mer. 129 p.
Centre for Environment, Fisheries, and Aquaculture Science (CEFAS). (2010). Sanitary survey of St Austell Bay. CEFASD report on behalf of the Food Standards Agency, to demonstrate compliance with the requirements for classification of bivalve mollusc production areas in England and Wales under EC Regulation No. 854/2.
Centre for Environment, Fisheries, and Aquaculture Science (CEFAS). (2016). St. Austel Bay - Ropehaven extension. Provisional RMP assessment.
Centre Régional d'Expérimentation et d'Application Aquacole (CREAA). (2012). L'exploitation des filières de La Malconche. Document d'information. 28 p.
Cornett, A. M. (2006). Inventory of Canada’s marine renewable energy resources. Tech. Rep., Canadian Hydraulics Centre. CHC-TR-041.
Corrigan, S., Smale, D. A., Tyler, C. R., and Brown, A. R. (2024). Quantification of finfish assemblages associated with mussel and seaweed farms in southwest UK provides evidence of potential benefits to fisheries. aquacult. Env. Interact. 16, 145-162. doi: 10.3354/aei00478
Costa, M., Silva, R., and Vitorino, J. (2001). Contribuicao para o estudio de clima de agitacao maritima na costa portuguesa. Inst. Hidrogr. Lisboa.
Cousineau, J., Pilechi, V., and E. Murphy. (2018). Regional wave run-up study for the Province of New Brunswick. NRC Tech. Rep. OCRE-TR-2018-026.
Croatia Ministry of Agriculture, Fisheries Directorate. (2010). Spatial planning for marine aquaculture; Croatian case. GFCM_CAG, WG on AZA. Sevilla, Spain. 2010
Department Agriculture, Forestry and Fisheries, Republic South Africa. (2010). Marine aquaculture annual report 2010. 28 p.
Department Environ., Forestry and Fisheries, Republic South Africa. (2020). Operation Phakisa. Unlocking the oceans economy through aquaculture. October 2014-2019. Aquaculture workstream. Year Five Review, 38 p.
Emmanouil, G., Galanis, G.,Kalogeri, C., Zodiatis, G., and G. Kallos. (2016). 10-year high resolution study of wind, seawaves and wave energy assessment in the Greek offshore areas. Renew. Energy 90, 399–419. doi: 732 10.1016/j.renene.2016.01.031.
Eum, H.-S., Jeong, W.-M., Chang, Y.S., Oh, S.-H., and Park, J.-J. (2020). Wave energy in Korean seas from 12-Year wave hindcasting. J. Mar. Sci. Eng. 8, 161. doi: 10.3390/jmse8030161
Fang, J., Jiang, Z., Lin, Fan., Gao, Y., Fang, J., Zhang, P., et al. (2020). Analysis on the advantages of standard kelp long line culture in Sanggou Bay. Prog. Fish. Sci. 41(5), 134-140. doi: 10.19663/j.issn2095-9869.20190625001 (in Chinese)
Fenwick, D. G., Ross, A. H., James, G. and Sagar, P. M. (2003). Marine farming in Canterbury: biophysical issues associated with suggested aquaculture management areas. NIWA Client Rep. CHC2003-045, 104 p.
Fikovska, E. (2023). Marine aquaculture success stories in Bulgaria. Int. Conf. Salt- Freswater Aquacult. Europe, Bucharest (Romania), 23-24 May, 2023.
Fondo Nacional de Desarrollo Pesquero (FONDEPES). (2020). Manual de concha de Abanico. Lima (Peru), 133 p.
Gagnon, M., and Bergeron, P. (2017). Observations of the loading and motion of a submerged mussel longline at an open ocean site. Aquacult. Eng. 78, 114–129. doi: 10.1016/j.aquaeng.2017.05.004
Gallagher, S., Tiron, R., Whelan, E., Gleeson, E., Dias, F., and McGrath, R. (2016). The nearshore wind and wave energy potential of Ireland: a high resolution assessment of availability and accessibility. Renew. Energy 88, 494–516. doi: 10.1016/j.renene.2015.11.010
Galparsoro, I., Liria, P., Legorburu, I., Ruiz-Minguela, P., Pérez, G., Marqués, J., et al. (2008). Atlas de energía del oleaje. La planificación espacial marina como herramienta en la selección de zonas adecuadas para la instalación de captadores. Revista de Investigación Marina 1: 9 pp
Gonçalves, M., Martinho, P., and Guedes Soares, C. (2018). A 33-year hindcast on wave energy assessment in the western French coast. Energy 165, 790–801. doi: 10.1016/j.renene.2013.06.028
Granja Marina San Julian. (2023). Granja Marina San Julian, Caleta Carolina, Bahia Camarones. https://docplayer.es/42114510-Caleta-carolina-bahia-camarones.html [Accessed Dec 17, 2023]
Guernsey Government (2020). Fishing and Aquaculture, 2020. Government of the States of Guernsey. https://www.gov.gg/fishing#:~:text=Sea%20Fisheries%20is%20responsible%20for,one%20licensed%20site%20on%20Herm [accessed March 16, 2024]
Guijarro, J. A., Campins, J., Barrera, E., Conde, J., Orro, L. and Picornell, A. (2021). Atlas de clima maritimo, 0-52oN, 35oW-12oD, 1991-2020. Agencia Estatal de Meteorologia. Madrid.
Guillou, N., and Chapalain, G. (2015). Numerical modelling of nearshore wave energy resource in the Sea of Iroise. Renew. Energy 83, 942–953. doi:10.1016/j.renene.2015.05.021
Guo, L., and Sheng, J. (2015). Statistical estimation of extreme ocean waves over the eastern Canadian shelf from 30-year numerical wave simulation. Ocean Dyn. 65, 1489–1507. doi: 10.1007/s10236-015-0878-y
Instituto de Hidraulica Ambiantal IH Cantabria (IDAE). (2011). Evaluacion del potencial de la energia de las olas. Estudio tecnico PER 2011-2020. Madrid (Spain), 226 p.
Jaugeon, B. (2018). Saint-Pierre & Miquelon. Document stratégique de bassin maritime. Fiches synthétiques des enjeux. DTAM-SAMP-UAM, 29 p.
Jeon, Y. H., Yoon, H. S., Kim, D. H., and Kim, H. T. (2012). Characteristics of incident waves on seaweed farm field around Gumilup Sea, Wando. J Kor. Soc. Mar. Environ. Engin. 15, 177-185. (in Korean)
Jersey Government. (2020). Fish and shellfish farming, 2020. https://www.gov.je/Industry/FarmingFishing/Fishing/Pages/FishFarming.aspx [Accessed March 16, 2024]
Joensen, B., Niclasen, B. A., and Bingham, H. B. (2021). Wave power assessment in Faroese waters using an oceanic to nearshore scale spectral wave model. Energy 235, 121404. doi: 10.1016/j.energy.2021.121404
Junta Nacional Asesora de Cultivos Marinos (JACUMAR). (2006). Cultivo de mytilidos: expansion y sostenibilidad. Plan naional de cultivos marinos. Subprojecto Andalucia. 154 p.
Kämpf, J., and Chapman, P. (2016). Upwelling systems of the World: a Scientific Journey to the most productive marine ecosystems. Berlin (Germany) Springer.
Kergadallan, X., Le Berre, A., Sanquer, R., and Leclerc, B. (2023a). Candhis: Analyses 2023 des états de mer—Tome 2 Méditerranée. CEREMA, Plouzané, France.
Kergadallan, X., Le Berre, A., Sanquer, R., and Leclerc, B. (2023b). Candhis: Analyses 2023 des états de mer—Tome 1 Mer du Nord, Manche et Atlantique. CEREMA, Plouzané, France.
Knight, B., Forrest, B., Taylor, D., MacKenzie, L., and Vennell, R . (2017). Potential aquaculture expansion in the eastern Bay of Plenty - A high-level scoping study of environmental issues. Prepared for Bay of Plenty Regional Council. Cawthron Report No. 3056. 65 p.
Knysh, A., Tsukrov, I., Chambers, M., Swift, M. R., Sullivan, C., and Drach A. (2020). Numerical modeling of submerged mussel longlines with protective sleeves. Aquacultural Eng. 88, 102027. doi: 10.1016/j.aquaeng.2019.102027
Lavidas, G. (2019). Energy and socio-economic benefits from the development of wave energy in Greece. Renew. Energy 132, 1290–1300. doi: 10.1016/j.renene.2018.09.007
Lavidas, G., and Polinder, H. (2019). North sea wave database (NSWD) and the need for reliable resource data: a 38 year database for metocean and wave energy assessments. Atmosphere 10, 551. doi: 10.3390/atmos10090551
Lavidas, G., and Venugopal, V. (2017). A 35 year high-resolution wave atlas for nearshore energy production and economics at the Aegean Sea. Renew. Energy 103, 401–417. doi: 10.1016/j.renene.2016.11.055
Li, D., Feng, J., Zhu, Y., Staneva J., Qi, J., Behrens, A., et al. (2022). Dynamical projections of the mean and extreme wave climate in the Bohai Sea, Yellow Sea and East China Sea. Front. Mar. Sci. 9. doi: 10.3389/fmars.2022.844113
Liang, B. C., Fan, F., Yin, Z.,G., Shi, H. D., and Lee, D. Y. (2013). Numerical modelling of the nearshore wave energy resources of Shandong Peninsula, China. Renew. Energy 57, 330–338. doi: 10.1016/j.renene.2013.01.052
Lin, J., Li, C., and Zhang, S. (2016). Hydrodynamic effect of a large offshore mussel suspended aquaculture farm. Aquaculture 451, 147–155. doi: 10.1016/j.aquaculture.2015.08.039
Liu, F. L, Liang, Z. R., Zhang, P. Y., Wang, W. J., Sun, X. T., Wang, F .J., and Yuan, Y. M. (2019). Preliminary discussion on the development of Saccharina japonica offshore aquaculture in China. Progr. Fish. Sci. 40(1): 161–166. doi: 10.19663/j.issn2095-9869.20180726002 In Chinese
Liu, X., and Zhang, X. (2022). Impacts of high-density suspended aquaculture on water currents: observation and modeling. JMSE 10, 1151. doi: 10.3390/jmse10081151
Lodise, J., Merrifield, S., Collins, C., Rogowski, P., Behrens, J., and Terrill, E. (2022). Global climatology of extratropical cyclones from a new tracking approach and associated wave heights from satellite radar altimeter. J. Geophys. Res. Ocean. 127. doi: 10.1029/2022JC018925
Lukin, A. (2014). Spatial planning for marine aquaculture, Croatia, Zadar County case. Croatian Ministry of Agriculture, Directorate of Fisheries.
Malta Government. (2014). Aquaculture strategy for the Maltese Islands. Towards sustainability. 2014-2025. Min. Sust. Develop. Environ. Climate Change, 18 p.
Mandić, M., Ikica, Z., and Gvozdenović, S. (2016). Mariculture in the Boka Kotorska Bay: Tradition, Current State and Perspective. In: Joksimović, A., Djurović, M., Semenov, A., Zonn, I., Kostianoy, A. (eds) The Boka Kotorska Bay Environment . The Handbook of Environmental Chemistry, vol 54. Springer, Cham. https://doi.org/10.1007/698_2016_33
Martinez, A., and Iglesias, G. (2020). Wave exploitability index and wave resource classification. Renew. Sustain. Energy Rev. 2020, 134, 110393. doi: https://doi.org/10.1016/j.rser.2020.110393
Mascorda-Cabre, L., Sheehan, E. V., Attrill, M. J., and Hosegood, P. (2024). Assessing the impact of an offshore longline mussel farm on local water circulation in a highly hydrodynamic energetic bay. Aquaculture 585, 740697. doi: 10.1016/j.aquaculture.2024.740697
Melville, K., Lenain, L., and Reineman, B. (2007). Wind and wave climatology in central and southern California. Scripps Instit. Oceanogr., RaDyO Planning Meeting, 6-8 June, 2007.
Merino, G., Cortes-Monroy, J., Abara, A., and Barraza, J. Y. (2001). Diseno y operacion de sistema de cultivo . In Los moluscos pectínidos de Iberoamérica: ciencia y acuicultura. A.N. Maeda-Martínez (ed.), Cap. 19: 375-404.
Morocco Government. (2020). Équipement et installation de fermes mytilicoles au profit de jeunes entrepreneurs de la région de Tanger Tetouan al Hoceima, zone de Cala Iris. Appel d'offres ouvert sur offre de prix. 01-CPMM/2020.
Morocco Government. (2023). Équipement et installation d'une ferme mytilicole au profit de jeunes entrepreneurs de la région de l'Oriental, zone de Ras el Ma. Appel d'offres ouvert sur offre de prix. 04-CPMM/2023.
Neumeier, U., and Joly, S. (2014). Vagues, courants, niveau d'eau et glace de mer aux Îles-de-la-Madeleine de juillet 2012 à juin 2013. Rapport final présenté au ministère des Transports du Québec. Institut des sciences de la mer de Rimouski, Université du Québec à Rimouski, février 2014, 70 p.
Neumeier, U., Ruest, B., Lambert, A., Bismuth, E., Dumont, D., Jacob, D., et al. (2013). Modélisation du régime des vagues du golfe et de l’estuaire du Saint-Laurent pour l’adaptation des infrastructures côtières aux changements climatiques. Rapport final présenté au ministère des Transports du Québec. Institut des sciences de la mer de Rimouski, Université du Québec à Rimouski, septembre 2013.
Neykov, N. M., Galabov, V., Korcheva, A., and Neychev, P. (2017). Return value estimates of significant wave height along Bulgarian Black Sea coast. Bulgarian Journal of Meteorology and Hydrology, 22, 1-2, 2-17.
Niclasen, B. A. and Simonsen, K. (2012). High resolution wave climate of the Faroe Islands. Tech. rep. Náttúruvísindadeildin, Fróðskaparsetur Føroya
Nilsson, E., Rutgersson, A., Dingwell, A., Björkqvist, J.V., Pettersson, H., Axell, L., et al. (2019). Characterization of wave energy potential for the Baltic Sea with focus on the Swedish exclusive economic zone. Energies 12, 793. doi: 10.3390/en12050793
Oliveros, C. 1987. Projet d'aménagement du port de Trozoul à Trébeurden. Conditions de houle dans l'avant port. BRGM 87 SGN 692 BRE, Rennes,Bretagne. 24 p.
Opotiki District Council (ODC). (2024). Whakatohea Mussel farm. https://www.odc.govt.nz/repository/libraries/id:2bpcqtp1b1cxby3k9b0b/hierarchy/sitecollectiondocuments/our-council/current-projects/opotiki-harbour-development-project/media-releases-and-updates/Opotiki%20Community%20Info%20Event%20-%20Ian%20Craig%20-%20Whakatohea%20Mussell%20Farm%20presentation.pdf
Pahiki Trading Company. (2017). Whakatohea marine farm. Assessment of environmental effects. 63 p.
Panchang, V.G., Jeong, C.,and Li, D. (2008). Wave climatology in coastal Maine for aquaculture and other applications. Est. Coast. J CERF 31, 289–299. doi:10.1007/s12237-007-9016-5
Plew, D.R. (2005). The hydrodynamic effects of long-line mussel farms. Ph.D. Thesis, University of Canterbury, Christchurch, New Zealand, 356 p.
Plew, D.R.,Stevens, C.L., Spigel, R.H., and Hartstein, N.D. (2005). Hydrodynamic implications of large offshore mussel farms. IEEE J. Ocean. Eng. 2005, 30, 95–108. doi: 10.1098/rstb.2010.0143
Pontes, M.T.; Aguiar, R.; Pires, H.O. (2005). A nearshore wave energy atlas for Portugal. J. Offshore Mech. Eng. 2005, 127, 249–255.
Ramsak, A., Bizjak, T., Robic, U., and Virsek, M. K. (2024). The need for innovations to secure the future of artisanal mussel farming in the coastal sea of the Gulf of Triestre (Slovania). Aquac. Rep. 36, 102166. doi: https://doi.org/10.1016/j.aqrep.2024.102166
Reid, J.A., and Mooney, W.D. (2022). Tsunami occurrence 1900–2020: A global review, with examples from Indonesia. Pure Appl. Geophys. 180, 1549–1571. doi: 10.1007/s00024-022-03057-1
Robertson, B., Hiles, C., Luczko, E., and Buckham, B. (2016). Quantifying wave power and wave energy converter array production potential. Int. J. Mar. Energy 14, 143–160. doi: 10.1016/j.ijome.2015.10.001
Rondeau, M.H., and F. Bossé-Côte. (2021). Salaweg: an update on kelp farming and processing. APC 22nd Annual Fish. Conf. January 2021.
Ruest, B. (2014). Utilisation d'un modèle paramétrique pour l'évaluation du climat de vagues de l'estuaire et du golfe du Saint-Laurent. Msc. Thesis, U. Québec at Rimouski. 90 p.
Ruest, B., Neumeier, U., Dumont, D., and Lambert, A. (2013). Wave climate evaluation in the Gulf of St. Lawrence with a parametric wave model. Extended Abstracts of Coastal Dynamics 2013: Coastal Dynamics Research Emphasizing Practical Applications, P. Bonneton and T. Garlan, Eds., SHOM, 1363–1374.
Salaweg. (2023). https://salaweg.com/fr/ [accessed March 27, 2024]
Santos, M. F. B. M. (2013). Certificacao na aquacutura offshore de moluscos bivalves. Thesis, U. do Algarve, Sagres, Portugal, 37 p.
Shimura, T. and Mori, N. (2019). High-resolution wave climate hindcast around Japan and its spectral representation. Coastal Eng. 151, 1-9. doi: 10.1016/j.coastaleng.2019.04.013
SHOM. (2019). Dossier de l’état de connaissance initiale des zones d’implantation du parc et de raccordement de la zone éolien en mer de Bretagne Sud: Volet Houle. SHOM 79/2019. 31 p.
SHOM. (2020). Description de l’état de la connaissance et des caractéristiques physiques de la macrozone éolien en mer de Bretagne Sud. 34 p.
SHOM. (2021a). Description de l’état de la connaissance et des caractéristiques physiques de la zone éolien en mer située au large d’Oléron et soumise à la consultation du public. 37 p.
SHOM. (2021b). Description de l’état de la connaissance et des caractéristiques physiques de la macrozone éolien en mer située en Méditerranée (Occitanie et Sud PACA). 27 p.
Simmons Corporate Finance(SCF). (2023). Whakatohea Mussels (Opotiki) Limited. Independent advisor report in respect of the issue of 2,000,000 fully paid ordinary shares to Crown Regional Holdings Ltd. 28 p.
Soukissian, T. H., Hatzinaki, M., Korres, G., Papadopoulos, A., Kallos, G., and Anadranistakis, E. (2007). Wind and wave atlas of the Hellenic seas. Anavyssos: Hellenic Centre for Marine Research, 287 p.
Tamburini, E., Turolla, E., Fano, E.A., and Castaldelli, G. (2020). Sustainability of mussel (Mytilus galloprovincialis) farming in the Po River Delta, Northern Italy, based on a life cycle assessment approach. Sustainability 2020, 12, 3814. doi:10.3390/su12093814
Tamigneaux, E., Licois, A., and Hersant, G. (2012). An overview of applied research on kelp aquaculture in Québec, Canada. The Seaweed Scene, U. of Maine, August 30, 2012.
Tasman District Council (TDC). (2019). Coastal hazards assessment in Tasman Bay/Te Tai O Aorere and Golden Bay/Mohua. 42 p.
Thomas, B., Costoya, X., and de Castro. M. (2023). Caracterización del recurso energético undimotriz en el Golfo de Vizcaya en un contexto de cambio climático. U. Vigo, Avances Ciencias Tierra 13, 1-21.
U.S. Army Corps of Engineers (USACE). (2014). Application for permit. KZO Mariculture Project. SPL-2012-0042-DPS, 12 p.
U.S. Army Corps of Engineers (USACE). (2018). Application for permit. Santa Barbara Mariculture. SPL-2018-00684-TS, 24 p.
Valchev, N., Davidan, I., Belberov, Z., Palazov, A., and Valcheva, N. (2010). Hindcasting and assessment of the western Black Sea wind and wave climate. J. Environ. Prot. Ecol. 11, 1001–1012.
Van Nieuwkoop, J. C. C., Smith, H. C. M., Smith, G. H. M., and Johanning, L. (20130. Wave resource assessment along the Cornish coast (UK) from a 23-year hindcast dataset validated against buoy measurements. Renew. Energy 58, 1–14. doi: 10.1016/j.renene.2013.02.033
Venugopal, V., and Nemalidinne, R. (2015). Wave resource assessment for Scottish waters using a large scale North Atlantic spectral wave model. Renew. Energy 76, 503–525. doi: 10.1016/j.renene.2014.11.056
Weisse, R., and Günther, H. (2007). Wave climate and long-term changes for the Southern North Sea obtained from a high-resolution hindcast 1958-2002. Ocean Dynamics 57 (3), 161–172. doi: 10.1007/s10236-006-0094-x
Whakatohea Mussels Opotiki Limited. (2014). Notice to mariners: installation of additional block of marine farm lines at Opotiki marine farm. 4 p.
Woo, H. J., and Park, K. A. (2017). Long-term trend of satellite-observed significant wave height and impact on ecosystem in the East/Japan Sea. Deep Sea Res. Part II Top. Stud. Oceanogr. 2017, 143, 1–14. doi: 10.1016/j.dsr2.2016.09.003
Yang, Z., Wu, W.-C., Wang, T., Garcia-Medina, G., and Castrucci, L.(2019). High-Resolution Regional Wave Hindcast for the U.S. Alaska Coast. PNNL Rep. 2019.
Yin, W., Ma, Y., Wang, D., He, S., and Huang, D. (2022). Surface upwelling off the Zhoushan Islands, East China Sea, from Himawari-8 AHI Data. Remote Sens. 14, 3261. doi: 10.3390/rs14143261
Zhang, L., Ren, G., Xu, M., Meng, F., Liao, R., Liu, D. et al. (2023). Spatiotemporal patterns of sea ice cover in the marginal seas of East Asia. Atmosphere 14(2), 207. https://doi.org/10.3390/atmos 14020207
Zhong, W., Lin, J., Zou, Q., Wen, Y., Yang, W., and Yang, G. (2022). Hydrodynamic effects of large scale suspended mussel farms: Field observations and numerical simulations. Front. Mar. Sci. 9, 973155. doi: 10.3389/fmars.2022.973155
Zorita, I., González, M., Solaun, O., Rodríguez,J. G., Revilla, M., Arantzamendi, L., et al. (2023). Pasos hacia una acuicultura sostenible de moluscos bivalvos en mar abierto en la costa del País Vasco. Revista de Investigación Marina, AZTI 29(3): 32-54. doi: 10.34838/rim.2023.32m8-mv94.
